# Supplementary material for: Transcriptional Profiling of a Patient-Matched Cohort of Glioblastoma (IDH-Wildtype) for Therapeutic Target and Repurposing Drug Identification
Source: Biomedicines. 2023 Apr 19;11(4):1219. doi: 10.3390/biomedicines11041219 (PMC10135924; doi:10.3390/biomedicines11041219)
Supplement: Supplementary file 1 [file biomedicines-11-01219-s001.zip]

Archive with 5 entries (5 files):
- biomedicines-2345963-supplementary.pdf
- Table S3_DEGs.xlsx
- Table S4_Validation.xlsx
- Table S6_GO_terms.xlsx
- Table S7_Quadratic_ALL.xlsx
