# Supplementary material for: Transcriptional Profiling of a Patient-Matched Cohort of Glioblastoma (IDH-Wildtype) for Therapeutic Target and Repurposing Drug Identification
Source: Biomedicines. 2023 Apr 19;11(4):1219. doi: 10.3390/biomedicines11041219 (PMC10135924; doi:10.3390/biomedicines11041219)
Supplement: Supplementary file 1 [file biomedicines-11-01219-s001.zip › Table S3_DEGs.xlsx]

## Sheet: C1_IPA_TAC
ID	Recurrent Avg (log2)	Initial Avg (log2)	Fold Change	P-val	Gene Symbol	Description	Group
TC1000007199.hg.1	11.19	12.24	-2.07	0.0001	ZEB1	zinc finger E-box binding homeobox 1	Multiple_Complex
TC0300008625.hg.1	7.36	8.44	-2.11	0.0001	Y_RNA	Y RNA [Source:RFAM;Acc:RF00019]	NonCoding
TC0600007366.hg.1	10.58	11.71	-2.18	0.0003			NonCoding
TC1200008551.hg.1	9.44	7.66	3.44	0.0004	RMST	rhabdomyosarcoma 2 associated transcript (non-protein coding)	NonCoding
TC0800006971.hg.1	4.28	5.31	-2.03	0.0005	lorkoy	Transcript Identified by AceView	Coding
TC0100017882.hg.1	4.43	5.55	-2.17	0.0006			NonCoding
TC0300008460.hg.1	5.01	6.19	-2.27	0.0007			NonCoding
TC1100011589.hg.1	4.51	6.35	-3.57	0.0008			NonCoding
TC1800006488.hg.1	8.43	7.35	2.12	0.0008	kawklar	Transcript Identified by AceView	Coding
TC0500007408.hg.1	4.23	5.27	-2.05	0.0009	GZMK	granzyme K	Multiple_Complex
TC0X00009911.hg.1	8.86	10.67	-3.51	0.001	VSIG4	V-set and immunoglobulin domain containing 4	Coding
TC1700010928.hg.1	6.01	4.94	2.1	0.001	klorslaw	Transcript Identified by AceView	Unassigned
TC0100016430.hg.1	7.85	6.73	2.18	0.001	RP3-395P12.2	novel transcript	NonCoding
TC0500006748.hg.1	7.23	6.16	2.1	0.0011	RPL30P7	ribosomal protein L30 pseudogene 7 [Source:HGNC Symbol;Acc:HGNC:36402]	Multiple_Complex
TC2100006957.hg.1	9.63	10.7	-2.1	0.0013	bymer	Transcript Identified by AceView	Unassigned
TC1900006959.hg.1	7.69	8.79	-2.15	0.0013			NonCoding
TC0600011201.hg.1	6.37	7.45	-2.11	0.0013			NonCoding
TC0600007371.hg.1	5.06	6.32	-2.41	0.0014			NonCoding
TC0600007657.hg.1	8.92	7.19	3.3	0.0015	HLA-DQA1	major histocompatibility complex, class II, DQ alpha 1	Multiple_Complex
TC0600008689.hg.1	3.89	5.05	-2.23	0.0015			NonCoding
TC0100006725.hg.1	6.78	5.58	2.3	0.0016	PER3	period circadian clock 3	Multiple_Complex
TC1200010397.hg.1	9.43	8.19	2.35	0.0016	CPNE8	copine VIII	Multiple_Complex
TC0100006968.hg.1	5.26	6.42	-2.24	0.0024	klubaw	Transcript Identified by AceView	Unassigned
TC0200007990.hg.1	4.36	5.54	-2.27	0.0025			NonCoding
TC0600007358.hg.1	5.35	6.36	-2.01	0.0028			NonCoding
TC0600013904.hg.1	4.01	5.33	-2.49	0.0031	RNASET2andRPS6KA2	Transcript Identified by AceView, Entrez Gene ID(s) 8635; 6196	Unassigned
TC0600007650.hg.1	9.1	7.64	2.75	0.0031	HLA-DRA	major histocompatibility complex, class II, DR alpha	Coding
TC1200009891.hg.1	6.22	4.85	2.58	0.0032	CLEC7A	C-type lectin domain family 7, member A	Multiple_Complex
TC0400011052.hg.1	6.62	5.46	2.24	0.0033	CXCL9	chemokine (C-X-C motif) ligand 9	Coding
TC1900007308.hg.1	6.04	7.26	-2.32	0.0034	veeglaw	Transcript Identified by AceView	Coding
TC0200008580.hg.1	4.99	6.02	-2.04	0.0042	RNU4-84P	RNA, U4 small nuclear 84, pseudogene [Source:HGNC Symbol;Acc:HGNC:47020]	Small_RNA
TC0600014276.hg.1	12.06	10.92	2.2	0.0044	HLA-DMB	major histocompatibility complex, class II, DM beta	Multiple_Complex
TC2100006718.hg.1	5.46	6.47	-2.02	0.0054			NonCoding
TC0700012908.hg.1	4.49	5.56	-2.09	0.0054	OR2A9P; OR2A20P	olfactory receptor, family 2, subfamily A, member 9 pseudogene; olfactory receptor, family 2, subfamily A, member 20 pseudogene	Multiple_Complex
TC1300009121.hg.1	4.18	5.56	-2.59	0.0057	AL353765.2		Precursor_microRNA
TC0100007892.hg.1	8.66	9.68	-2.02	0.0059			NonCoding
TC0100009647.hg.1	14.48	13.47	2.02	0.006			NonCoding
TC1200012108.hg.1	4.59	5.63	-2.05	0.0062	smogoyby	Transcript Identified by AceView	Unassigned
TC0700009492.hg.1	8.78	9.82	-2.05	0.0063	RP11-563K23.1	novel transcript	NonCoding
TC0600011258.hg.1	10.62	11.68	-2.08	0.0065			NonCoding
TC1900011255.hg.1	6.98	8	-2.04	0.0066	SIGLEC10	sialic acid binding Ig-like lectin 10	Multiple_Complex
TC1600006445.hg.1	11.19	8.08	8.63	0.0069	HBA2	hemoglobin, alpha 2	Multiple_Complex
TC1300007719.hg.1	7.34	6.32	2.02	0.0074	spanor	Transcript Identified by AceView	Unassigned
TC0100010704.hg.1	9.79	8.76	2.04	0.0078	RP11-318C24.1		Multiple_Complex
TC0100009636.hg.1	8.18	6.97	2.32	0.0078			NonCoding
TC1100009917.hg.1	11.31	8.15	8.95	0.0079	HBB	hemoglobin, beta	Multiple_Complex
TC1600006446.hg.1	9.62	6.77	7.22	0.0079	HBA1	hemoglobin, alpha 1	Multiple_Complex
TC0700012266.hg.1	7.74	8.85	-2.15	0.0082			NonCoding
TC1600006996.hg.1	4.67	5.67	-2	0.0086	RNU7-125P	RNA, U7 small nuclear 125 pseudogene [Source:HGNC Symbol;Acc:HGNC:45659]	Small_RNA
TC1000010468.hg.1	8.02	6.91	2.15	0.0087	CXCL12	chemokine (C-X-C motif) ligand 12	Multiple_Complex
TC1600007657.hg.1	7.52	9.55	-4.08	0.0087	NAMPTP3	nicotinamide phosphoribosyltransferase pseudogene 3 [Source:HGNC Symbol;Acc:HGNC:51313]	Multiple_Complex
TC0600010455.hg.1	7.34	8.62	-2.44	0.0096			NonCoding
TC0100015755.hg.1	6.7	5.68	2.03	0.0098	deepybu	Transcript Identified by AceView	Coding
TC0100014897.hg.1	10.15	9.1	2.08	0.01	blubar	Transcript Identified by AceView	Unassigned
TC0700007596.hg.1	6.56	7.66	-2.15	0.0101	EGFR	epidermal growth factor receptor	Multiple_Complex
TC1300008609.hg.1	9.19	7.76	2.69	0.0102	DCLK1	doublecortin-like kinase 1	Multiple_Complex
TC0800011537.hg.1	9.37	8.35	2.04	0.0103	gloverby	Transcript Identified by AceView	Unassigned
TC0800009735.hg.1	14.06	15.1	-2.06	0.0104	MTUS1	microtubule associated tumor suppressor 1	Multiple_Complex
TC0200014904.hg.1	6.05	4.72	2.51	0.011			NonCoding
TC0700010322.hg.1	5.63	4.47	2.24	0.0113	jyky	Transcript Identified by AceView	Unassigned
TC0600007677.hg.1	8.34	7.03	2.47	0.0113	HLA-DPB1	major histocompatibility complex, class II, DP beta 1	Multiple_Complex
TC0800011807.hg.1	4.56	5.59	-2.04	0.0121			NonCoding
TC0800011808.hg.1	4.56	5.59	-2.04	0.0121			NonCoding
TC1100011794.hg.1	11.62	10.28	2.53	0.0122	PRCP	prolylcarboxypeptidase	Multiple_Complex
TC0100008520.hg.1	13.62	12.45	2.25	0.0125	luzawbo	Transcript Identified by AceView	Unassigned
TC0100018310.hg.1	7.62	6.24	2.6	0.0126	FCGR2B	Fc fragment of IgG, low affinity IIb, receptor (CD32)	Multiple_Complex
TC0600006471.hg.1	4.72	5.89	-2.24	0.0127			NonCoding
TC0600011223.hg.1	10.06	12.06	-4	0.013			NonCoding
TC1000012068.hg.1	7.5	8.83	-2.52	0.0132	gokleybu	Transcript Identified by AceView	Unassigned
TC0300009667.hg.1	4.86	5.96	-2.13	0.0132	SNORA81	Small nucleolar RNA SNORA81 [Source:RFAM;Acc:RF01241]	Small_RNA
TC0700007597.hg.1	5.77	6.92	-2.22	0.0152	ruhora	Transcript Identified by AceView	Unassigned
TC0700008475.hg.1	7.73	9.02	-2.46	0.0153	MIR3609	microRNA 3609	Multiple_Complex
TC0300012824.hg.1	4.54	3.48	2.08	0.016			NonCoding
TC1900008669.hg.1	10.18	8.67	2.85	0.0161	FPR3	formyl peptide receptor 3	Coding
TC0100010188.hg.1	5.37	6.41	-2.05	0.0162	BCAN	brevican	Multiple_Complex
TC0200006681.hg.1	3.84	5.08	-2.35	0.0162			NonCoding
TC0300010795.hg.1	5.53	6.66	-2.2	0.0164	RNU5B-2P	RNA, U5B small nuclear 2, pseudogene [Source:HGNC Symbol;Acc:HGNC:34182]	Small_RNA
TC1500007237.hg.1	6.08	7.19	-2.16	0.0164	SCG3	secretogranin III	Multiple_Complex
TC0200015007.hg.1	7.38	8.51	-2.2	0.017			NonCoding
TC0700011480.hg.1	12.84	13.88	-2.06	0.0178	Y_RNA	Y RNA [Source:RFAM;Acc:RF00019]	NonCoding
TC0300012816.hg.1	4.9	6.15	-2.38	0.0178	P2RY12	purinergic receptor P2Y, G-protein coupled, 12	Multiple_Complex
TC1800008439.hg.1	7.33	8.38	-2.08	0.018	Y_RNA	Y RNA [Source:RFAM;Acc:RF00019]	NonCoding
TC0600011202.hg.1	13.77	15.37	-3.02	0.0181			NonCoding
TSUnmapped00000634.hg.1	6.44	7.45	-2.01	0.0181	AL772161.2		Small_RNA
TC0600007356.hg.1	13.62	15.61	-3.96	0.0183			NonCoding
TC0600009687.hg.1	3.97	5.24	-2.41	0.0188			NonCoding
TC1300009663.hg.1	6.19	7.68	-2.81	0.019	RP11-347N5.3	TEC	Unassigned
TC0500012255.hg.1	4.7	5.94	-2.36	0.019	doskoyby	Transcript Identified by AceView	Coding
TC0100017184.hg.1	10.66	12	-2.53	0.0196	RNU5A-8P	RNA, U5A small nuclear 8, pseudogene [Source:HGNC Symbol;Acc:HGNC:42530]	Small_RNA
TC1600006668.hg.1	10.07	11.25	-2.26	0.02			NonCoding
TC0900009027.hg.1	12.12	13.85	-3.33	0.02	RNU5D-2P	RNA, U5D small nuclear 2, pseudogene [Source:HGNC Symbol;Acc:HGNC:42534]	Small_RNA
TC0100009033.hg.1	3.79	4.82	-2.05	0.0203	kirero	Transcript Identified by AceView	Coding
TC1200008162.hg.1	9.01	10.09	-2.11	0.0204	CNOT2	CCR4-NOT transcription complex subunit 2	Multiple_Complex
TC1000010783.hg.1	6.28	7.89	-3.04	0.0205	dylor	Transcript Identified by AceView	Unassigned
TC1100012216.hg.1	8.62	6.11	5.7	0.0206	SLN	sarcolipin	Coding
TC0800006774.hg.1	6.52	7.69	-2.26	0.0213	AC145124.1		Precursor_microRNA
TC0600007013.hg.1	6.85	5.71	2.2	0.0217	reyblor	Transcript Identified by AceView	Unassigned
TC0X00009192.hg.1	14.97	16.33	-2.56	0.0222			NonCoding
TC0200013426.hg.1	6.06	7.24	-2.27	0.0226	hotoyo	Transcript Identified by AceView	Unassigned
TC0700006795.hg.1	11.47	9.63	3.58	0.0228	AHR	aryl hydrocarbon receptor	Multiple_Complex
TC1900009290.hg.1	3.99	5.09	-2.15	0.0229	SNORD38	Small nucleolar RNA SNORD38 [Source:RFAM;Acc:RF00212]	Small_RNA
TC2100007176.hg.1	8.41	6.72	3.23	0.0232	PCP4	Purkinje cell protein 4	Multiple_Complex
TC0600014273.hg.1	9.3	8.22	2.12	0.0235	HLA-DRB1	major histocompatibility complex, class II, DR beta 1	Multiple_Complex
TC0300007978.hg.1	4.31	5.53	-2.34	0.0236			NonCoding
TC2000009646.hg.1	6.42	5.2	2.32	0.0247	CTSZ	cathepsin Z	Multiple_Complex
TC0100015687.hg.1	6.24	5.13	2.17	0.0248	RP11-277L2.5		NonCoding
TC1500008546.hg.1	8.48	9.63	-2.21	0.0252	terchubu	Transcript Identified by AceView	Unassigned
TC0500012684.hg.1	4.08	5.52	-2.72	0.0265			NonCoding
TC1100011817.hg.1	5.62	6.69	-2.11	0.0268	snoygleebu	Transcript Identified by AceView	Unassigned
TC0500010774.hg.1	11.15	10.08	2.1	0.0275	MIR5687	microRNA 5687	Precursor_microRNA
TC0600011712.hg.1	4	5.4	-2.64	0.0296			NonCoding
TC0300009782.hg.1	9.11	8.07	2.06	0.0304	EIF4A2; SNORA63; SNORD2; SNORA4; SNORA81; MIR1248	eukaryotic translation initiation factor 4A2; small nucleolar RNA, H/ACA box 63; small nucleolar RNA, C/D box 2; small nucleolar RNA, H/ACA box 4; small nucleolar RNA, H/ACA box 81; microRNA 1248	Multiple_Complex
TC1500008521.hg.1	11.78	10.68	2.14	0.0306	MEF2A	myocyte enhancer factor 2A	Multiple_Complex
TC0700008055.hg.1	12.34	13.34	-2	0.0309	Y_RNA	Y RNA [Source:RFAM;Acc:RF00019]	NonCoding
TC0900009852.hg.1	7.57	6.2	2.57	0.0309	dersoby	Transcript Identified by AceView	Unassigned
TC1500009429.hg.1	10.21	9.13	2.13	0.0312	DMXL2	Dmx-like 2	Multiple_Complex
TC1400009624.hg.1	10.87	11.96	-2.13	0.0314	Y_RNA	Y RNA [Source:RFAM;Acc:RF00019]	NonCoding
TC0400011279.hg.1	5	6.27	-2.4	0.0317	ABCG2	ATP binding cassette subfamily G member 2 (Junior blood group)	Multiple_Complex
TC0200007761.hg.1	7.19	8.4	-2.31	0.0319	hihora	Transcript Identified by AceView	Unassigned
TC1100010708.hg.1	9.07	8.05	2.02	0.032	rerloby	Transcript Identified by AceView	Coding
TC1200008133.hg.1	11.08	8.93	4.42	0.0322	LYZ	lysozyme	Multiple_Complex
TC0700006913.hg.1	8.95	7.59	2.57	0.0323	GPNMB	glycoprotein (transmembrane) nmb	Multiple_Complex
TC0600011222.hg.1	13.76	15.25	-2.81	0.0347			NonCoding
TC1400009598.hg.1	6.03	5.01	2.03	0.0349			NonCoding
TC0800008299.hg.1	10.39	9.19	2.3	0.0353	SDC2	syndecan 2	Multiple_Complex
TC0700012233.hg.1	5.88	7.01	-2.18	0.0365	sehura	Transcript Identified by AceView	Coding
TC0900012034.hg.1	8.37	9.37	-2	0.0368			NonCoding
TC0500012138.hg.1	4.83	5.96	-2.19	0.0371	SPOCK1	sparc/osteonectin, cwcv and kazal-like domains proteoglycan (testican) 1	Multiple_Complex
TC0800011206.hg.1	17.64	16.34	2.48	0.0373	RPL30	ribosomal protein L30	Multiple_Complex
TC1700007851.hg.1	13.41	12.41	2.01	0.0381	EIF1	eukaryotic translation initiation factor 1	Multiple_Complex
TC0200007996.hg.1	7.87	6.72	2.22	0.0384	AC007881.4		Multiple_Complex
TC0700007000.hg.1	10.94	9.72	2.33	0.0389	HOTAIRM1	HOXA transcript antisense RNA, myeloid-specific 1	NonCoding
TC0500013330.hg.1	8.86	7.75	2.16	0.0393			NonCoding
TC0400007836.hg.1	8.53	10.8	-4.84	0.0393	CXCL8	chemokine (C-X-C motif) ligand 8	Multiple_Complex
TC0400009675.hg.1	14.51	13.29	2.33	0.0399	RP11-478C6.4		Multiple_Complex
TC1400010741.hg.1	12.37	11.13	2.37	0.0414	RPS29; RPL32P29	ribosomal protein S29; ribosomal protein L32 pseudogene 29	Multiple_Complex
TC1600006675.hg.1	8.64	10.15	-2.84	0.0422			NonCoding
TC1800008170.hg.1	8.69	7.32	2.58	0.0425	AC006557.1		Precursor_microRNA
TC1600006671.hg.1	8.57	9.67	-2.14	0.043			NonCoding
TSUnmapped00000842.hg.1	8.57	9.67	-2.14	0.043			NonCoding
TC1200008160.hg.1	10.46	11.85	-2.62	0.0443			NonCoding
TC0100011105.hg.1	12.82	11.69	2.2	0.0451	PTPRC	protein tyrosine phosphatase, receptor type, C	Multiple_Complex
TC0100017939.hg.1	6.36	7.49	-2.18	0.0452			NonCoding
TC0800011806.hg.1	6.42	4.88	2.91	0.0476			NonCoding
TC1600006673.hg.1	9.11	10.31	-2.3	0.0478			NonCoding
TC0X00010074.hg.1	9.02	8.01	2.01	0.0485	RP13-204A15.5	TEC	Unassigned
TC1900010038.hg.1	5.25	6.27	-2.02	0.0493	veekee	Transcript Identified by AceView	Coding
