# Supplementary material for: Transcriptional Profiling of a Patient-Matched Cohort of Glioblastoma (IDH-Wildtype) for Therapeutic Target and Repurposing Drug Identification
Source: Biomedicines. 2023 Apr 19;11(4):1219. doi: 10.3390/biomedicines11041219 (PMC10135924; doi:10.3390/biomedicines11041219)
Supplement: Supplementary file 1 [file biomedicines-11-01219-s001.zip › Table S4_Validation.xlsx]

## Sheet: Table 
		CGGA			Kwon et al.			TCGA-GBM			HF-MDA
Symbol	Belfast	P-value	UP/DN		P-value	UP/DN		P-value	UP/DN		P-value	UP/DN	Gene validated
FPR3	UP	0.001306	UP		NS			NS			NS		Y
SDC2	UP	0.003709	UP		NS			0.04	UP		NS		Y
FCGR2B	UP	0.005412	UP		NS			NS			NS		Y
GPNMB	UP	0.006232	UP		NS			NS			NS		Y
CTSZ	UP	0.006674	UP		NS			0.05	UP		NS		Y
AHR	UP	0.008504	UP		NS			NS			NS		Y
HLA-DRA	UP	0.01929	UP		NA			NA			NA		Y
CXCL12	UP	0.02002	UP		NS			NS			NS		Y
LYZ	UP	0.03243	UP		NS			NS			NS		Y
SPOCK1	DN	0.03678	UP		NS			0.01	UP		0.02	UP	O
BCAN	DN	0.03683	DN		NS			NS			NS		Y
PTPRC	UP	NS			0.004	DN		NS			NS		O
VSIG4	DN	NS			NS			NS			NS		N
RMST	UP	NS			NA			NA			NA		N
HLA-DMB	UP	NS			NA			NA			NA		N
MEF2A	UP	NS			0.001	DN		0.01	UP		NS		Y
SCG3	DN	NS			NS			0.03	UP		NS		O
HOTAIRM1	UP	NS			NA			NA			NA		N
HLA-DQA1	UP	NS			NA			NA			NA		N
EIF1	UP	NS			NS			0.01	UP		NS		Y
DMXL2	UP	NS			NS			0.03	DN		NS		O
CNOT2	DN	NS			NS			3e-06	DN		NS		Y
HLA-DPB1	UP	NS			NA			NA			NA		N
ABCG2	DN	NS			NS			0.01	DN		0.03	DN	Y
HBA2	UP	NS			NS			NS			NS		N
RPS29	UP	NS			NS			NS			NS		N
HBA1	UP	NS			NS			NS			NS		N
HBB	UP	NS			NS			NS			NS		N
MTUS1	DN	NS			NS			NS			NS		N
CXCL8 (IL8)	DN	NS			NS			NS			NS		N
CLEC7A	UP	NS			NS			0.03	DN		NS		O
EGFR	DN	NS			NS			NS			NS		N
CXCL9	UP	NS			NS			NS			NS		N
GZMK	DN	NS			NS			0.01	DN		NS		Y
ZEB1	DN	NS			NS			NS			NS		N
DCLK1	UP	NS			NS			NS			NS		N
CPNE8	UP	NS			NS			NS			NS		N
SLN	UP	NS			NS			NS			NS		N
PCP4	UP	NS			NS			NS			NS		N
PER3	UP	NS			NS			NS			NS		N
PRCP	UP	NS			NS			NS			NS		N
HLA-DRB1	UP	NS			NA			NA			NA		N
SIGLEC10	DN	NS			NS			NS			NS		N
RPL30	UP	NS			NS			0.01	UP		NS		Y
EIF4A2	UP	NS			NS			0.03	UP		NS		Y
P2RY12	DN	NS			NS			NS			NS		N
RPL30P7	UP	NA			NA			NA			NA		NA
RNU4-84P	DN	NA			NA			NA			NA		NA
OR2A20P	DN	NA			NA			NA			NA		NA
RNU7-125P	DN	NA			NA			NA			NA		NA
NAMPTP3	DN	NA			NA			NA			NA		NA
SNORA81	DN	NA			NA			NA			NA		NA
MIR3609	DN	NA			NA			NA			NA		NA
RNU5B-2P	DN	NA			NA			NA			NA		NA
RNU5A-8P	DN	NA			NA			NA			NA		NA
RNU5D-2P	DN	NA			NA			NA			NA		NA
MIR5687	UP	NA			NA			NA			NA		NA
