# Supplementary material for: Transcriptional Profiling of a Patient-Matched Cohort of Glioblastoma (IDH-Wildtype) for Therapeutic Target and Repurposing Drug Identification
Source: Biomedicines. 2023 Apr 19;11(4):1219. doi: 10.3390/biomedicines11041219 (PMC10135924; doi:10.3390/biomedicines11041219)
Supplement: Supplementary file 1 [file biomedicines-11-01219-s001.zip › Table S6_GO_terms.xlsx]

## Sheet: BP
GO biological process complete	BG_Genes.txt - REFLIST (14893)	upload_1 (45)	upload_1 (expected)	upload_1 (over/under)	upload_1 (fold Enrichment)	upload_1 (raw P-value)	upload_1 (FDR)
antigen processing and presentation of endogenous peptide antigen via MHC class II (GO:0002491)	2	2	0.01	+	> 100	5.3e-05	0.0124
myeloid dendritic cell antigen processing and presentation (GO:0002469)	2	2	0.01	+	> 100	5.3e-05	0.0123
peptide antigen assembly with MHC class II protein complex (GO:0002503)	4	3	0.01	+	> 100	8.87e-07	0.000555
MHC class II protein complex assembly (GO:0002399)	4	3	0.01	+	> 100	8.87e-07	0.000533
dendritic cell antigen processing and presentation (GO:0002468)	3	2	0.01	+	> 100	8.82e-05	0.0177
positive regulation of CD4-positive, CD25-positive, alpha-beta regulatory T cell differentiation (GO:0032831)	3	2	0.01	+	> 100	8.82e-05	0.0174
regulation of CD4-positive, CD25-positive, alpha-beta regulatory T cell differentiation (GO:0032829)	3	2	0.01	+	> 100	8.82e-05	0.0172
peptide antigen assembly with MHC protein complex (GO:0002501)	6	3	0.02	+	> 100	2.12e-06	0.000909
MHC protein complex assembly (GO:0002396)	7	3	0.02	+	> 100	3.02e-06	0.00123
positive regulation of memory T cell differentiation (GO:0043382)	5	2	0.02	+	> 100	0.000185	0.0308
negative regulation of T cell mediated cytotoxicity (GO:0001915)	6	2	0.02	+	> 100	0.000246	0.0373
oxygen transport (GO:0015671)	7	2	0.02	+	94.56	0.000315	0.0423
regulation of memory T cell differentiation (GO:0043380)	8	2	0.02	+	82.74	0.000393	0.0496
negative regulation of macrophage activation (GO:0043031)	13	3	0.04	+	76.37	1.39e-05	0.00402
regulation of T cell mediated cytotoxicity (GO:0001914)	26	4	0.08	+	50.92	1.86e-06	0.000846
positive regulation of T cell mediated cytotoxicity (GO:0001916)	21	3	0.06	+	47.28	4.95e-05	0.0118
antigen processing and presentation of peptide or polysaccharide antigen via MHC class II (GO:0002504)	85	8	0.26	+	31.15	2.96e-10	4.45e-06
hydrogen peroxide metabolic process (GO:0042743)	32	3	0.1	+	31.03	0.000156	0.0273
killing of cells of other organism (GO:0031640)	58	5	0.18	+	28.53	1.22e-06	0.000631
antigen processing and presentation of peptide antigen via MHC class II (GO:0002495)	84	7	0.25	+	27.58	9.26e-09	3.48e-05
antigen processing and presentation of exogenous peptide antigen via MHC class II (GO:0019886)	84	7	0.25	+	27.58	9.26e-09	2.78e-05
interferon-gamma-mediated signaling pathway (GO:0060333)	63	5	0.19	+	26.27	1.79e-06	0.000838
positive regulation of leukocyte mediated cytotoxicity (GO:0001912)	38	3	0.11	+	26.13	0.000251	0.0378
positive regulation of cell killing (GO:0031343)	53	4	0.16	+	24.98	2.53e-05	0.00677
positive regulation of T cell mediated immunity (GO:0002711)	40	3	0.12	+	24.82	0.00029	0.0399
regulation of leukocyte mediated cytotoxicity (GO:0001910)	57	4	0.17	+	23.22	3.31e-05	0.00872
regulation of interleukin-10 production (GO:0032653)	43	3	0.13	+	23.09	0.000354	0.0467
regulation of T cell mediated immunity (GO:0002709)	60	4	0.18	+	22.06	4e-05	0.01
regulation of macrophage activation (GO:0043030)	45	3	0.14	+	22.06	0.000402	0.0499
cell killing (GO:0001906)	83	5	0.25	+	19.94	6.42e-06	0.00224
antimicrobial humoral immune response mediated by antimicrobial peptide (GO:0061844)	67	4	0.2	+	19.76	6.03e-05	0.0135
negative regulation of mononuclear cell proliferation (GO:0032945)	68	4	0.21	+	19.47	6.37e-05	0.0141
negative regulation of lymphocyte proliferation (GO:0050672)	68	4	0.21	+	19.47	6.37e-05	0.0139
regulation of cell killing (GO:0031341)	86	5	0.26	+	19.24	7.57e-06	0.00242
negative regulation of leukocyte proliferation (GO:0070664)	74	4	0.22	+	17.89	8.71e-05	0.0177
antimicrobial humoral response (GO:0019730)	105	5	0.32	+	15.76	1.91e-05	0.00541
negative regulation of leukocyte cell-cell adhesion (GO:1903038)	106	5	0.32	+	15.61	1.99e-05	0.00555
regulation of lymphocyte proliferation (GO:0050670)	177	8	0.53	+	14.96	6.93e-08	0.000104
regulation of T cell proliferation (GO:0042129)	133	6	0.4	+	14.93	3.52e-06	0.00136
regulation of mononuclear cell proliferation (GO:0032944)	178	8	0.54	+	14.87	7.23e-08	9.04e-05
antigen processing and presentation of exogenous peptide antigen (GO:0002478)	158	7	0.48	+	14.66	5.63e-07	0.000384
antigen processing and presentation of exogenous antigen (GO:0019884)	164	7	0.5	+	14.13	7.17e-07	0.000468
positive regulation of leukocyte mediated immunity (GO:0002705)	94	4	0.28	+	14.08	0.000211	0.0334
negative regulation of T cell activation (GO:0050868)	95	4	0.29	+	13.93	0.00022	0.0343
regulation of leukocyte proliferation (GO:0070663)	194	8	0.59	+	13.65	1.37e-07	0.000128
antigen processing and presentation (GO:0019882)	195	8	0.59	+	13.58	1.42e-07	0.000125
antigen processing and presentation of peptide antigen (GO:0048002)	171	7	0.52	+	13.55	9.39e-07	0.000542
T cell receptor signaling pathway (GO:0050852)	149	6	0.45	+	13.33	6.61e-06	0.00225
cellular response to interferon-gamma (GO:0071346)	126	5	0.38	+	13.13	4.43e-05	0.0109
translational initiation (GO:0006413)	110	4	0.33	+	12.03	0.000377	0.0488
calcium-mediated signaling (GO:0019722)	113	4	0.34	+	11.72	0.000416	0.0499
response to interferon-gamma (GO:0034341)	143	5	0.43	+	11.57	7.92e-05	0.0168
negative regulation of cell-cell adhesion (GO:0022408)	144	5	0.44	+	11.49	8.18e-05	0.0171
regulation of leukocyte cell-cell adhesion (GO:1903037)	264	9	0.8	+	11.28	9.93e-08	0.000107
negative regulation of leukocyte activation (GO:0002695)	148	5	0.45	+	11.18	9.27e-05	0.0178
negative regulation of cell activation (GO:0050866)	162	5	0.49	+	10.21	0.00014	0.0247
negative regulation of cell adhesion (GO:0007162)	227	7	0.69	+	10.21	5.78e-06	0.00207
regulation of T cell activation (GO:0050863)	264	8	0.8	+	10.03	1.31e-06	0.000656
regulation of leukocyte mediated immunity (GO:0002703)	168	5	0.51	+	9.85	0.000165	0.0285
positive regulation of immune effector process (GO:0002699)	174	5	0.53	+	9.51	0.000194	0.032
humoral immune response (GO:0006959)	245	7	0.74	+	9.46	9.39e-06	0.00288
positive regulation of T cell activation (GO:0050870)	176	5	0.53	+	9.4	0.000204	0.0326
antigen receptor-mediated signaling pathway (GO:0050851)	214	6	0.65	+	9.28	4.81e-05	0.0116
positive regulation of leukocyte cell-cell adhesion (GO:1903039)	193	5	0.58	+	8.57	0.000309	0.0422
regulation of cell-cell adhesion (GO:0022407)	348	9	1.05	+	8.56	9.53e-07	0.00053
regulation of lymphocyte activation (GO:0051249)	397	10	1.2	+	8.34	2.75e-07	0.000206
second-messenger-mediated signaling (GO:0019932)	243	6	0.73	+	8.17	9.54e-05	0.0181
receptor-mediated endocytosis (GO:0006898)	204	5	0.62	+	8.11	0.000396	0.0496
immune response-activating cell surface receptor signaling pathway (GO:0002429)	334	8	1.01	+	7.93	7.16e-06	0.00239
immune response-activating signal transduction (GO:0002757)	334	8	1.01	+	7.93	7.16e-06	0.00234
activation of immune response (GO:0002253)	388	9	1.17	+	7.68	2.29e-06	0.000957
immune response-regulating cell surface receptor signaling pathway (GO:0002768)	362	8	1.09	+	7.31	1.27e-05	0.00382
immune response-regulating signaling pathway (GO:0002764)	365	8	1.1	+	7.25	1.35e-05	0.00397
adaptive immune response (GO:0002250)	413	9	1.25	+	7.21	3.78e-06	0.00142
positive regulation of lymphocyte activation (GO:0051251)	278	6	0.84	+	7.14	0.000196	0.0319
regulation of leukocyte activation (GO:0002694)	465	10	1.41	+	7.12	1.13e-06	0.000605
inflammatory response (GO:0006954)	388	8	1.17	+	6.82	2.07e-05	0.00566
regulation of cell adhesion (GO:0030155)	593	12	1.79	+	6.7	1.47e-07	0.000117
regulation of cell activation (GO:0050865)	498	10	1.5	+	6.65	2.07e-06	0.000914
positive regulation of cell adhesion (GO:0045785)	356	7	1.08	+	6.51	9.67e-05	0.0182
regulation of immune effector process (GO:0002697)	356	7	1.08	+	6.51	9.67e-05	0.0179
positive regulation of leukocyte activation (GO:0002696)	312	6	0.94	+	6.36	0.000359	0.0469
positive regulation of cell activation (GO:0050867)	321	6	0.97	+	6.19	0.000417	0.0497
positive regulation of immune response (GO:0050778)	549	10	1.66	+	6.03	4.86e-06	0.00178
positive regulation of immune system process (GO:0002684)	808	14	2.44	+	5.73	7.06e-08	9.64e-05
positive regulation of cell migration (GO:0030335)	423	7	1.28	+	5.48	0.000275	0.0386
cytokine-mediated signaling pathway (GO:0019221)	545	9	1.65	+	5.47	3.34e-05	0.00865
defense response (GO:0006952)	1050	17	3.17	+	5.36	4.7e-09	2.35e-05
defense response to other organism (GO:0098542)	749	12	2.26	+	5.3	1.7e-06	0.000825
positive regulation of cell motility (GO:2000147)	437	7	1.32	+	5.3	0.000334	0.0444
positive regulation of locomotion (GO:0040017)	448	7	1.35	+	5.17	0.000387	0.0497
positive regulation of cellular component movement (GO:0051272)	449	7	1.36	+	5.16	0.000392	0.0499
response to other organism (GO:0051707)	1041	16	3.15	+	5.09	3.22e-08	6.91e-05
response to external biotic stimulus (GO:0043207)	1042	16	3.15	+	5.08	3.27e-08	6.13e-05
response to biotic stimulus (GO:0009607)	1072	16	3.24	+	4.94	4.83e-08	8.07e-05
positive regulation of cell differentiation (GO:0045597)	652	9	1.97	+	4.57	0.00013	0.0236
immune response (GO:0006955)	1465	20	4.43	+	4.52	2.17e-09	1.63e-05
regulation of immune system process (GO:0002682)	1306	17	3.95	+	4.31	1.15e-07	0.000115
cell adhesion (GO:0007155)	715	9	2.16	+	4.17	0.000258	0.0384
regulation of cell migration (GO:0030334)	717	9	2.17	+	4.15	0.000264	0.0381
biological adhesion (GO:0022610)	720	9	2.18	+	4.14	0.000272	0.0389
cellular response to cytokine stimulus (GO:0071345)	811	10	2.45	+	4.08	0.000131	0.0234
regulation of immune response (GO:0050776)	842	10	2.54	+	3.93	0.000178	0.0303
regulation of cell motility (GO:2000145)	760	9	2.3	+	3.92	0.000403	0.0497
positive regulation of transport (GO:0051050)	762	9	2.3	+	3.91	0.000411	0.0498
biological process involved in interspecies interaction between organisms (GO:0044419)	1630	19	4.93	+	3.86	8.5e-08	9.82e-05
immune effector process (GO:0002252)	866	10	2.62	+	3.82	0.000223	0.0341
response to cytokine (GO:0034097)	889	10	2.69	+	3.72	0.000275	0.0389
cell activation (GO:0001775)	892	10	2.7	+	3.71	0.000282	0.0392
regulation of response to external stimulus (GO:0032101)	904	10	2.73	+	3.66	0.000314	0.0425
response to external stimulus (GO:0009605)	1879	20	5.68	+	3.52	1.46e-07	0.000122
immune system process (GO:0002376)	2183	23	6.6	+	3.49	1.06e-08	2.66e-05
regulation of cell population proliferation (GO:0042127)	1293	13	3.91	+	3.33	8.39e-05	0.0173
regulation of cell differentiation (GO:0045595)	1249	12	3.77	+	3.18	0.000258	0.0381
positive regulation of response to stimulus (GO:0048584)	1768	16	5.34	+	3	3.46e-05	0.0088
cellular response to chemical stimulus (GO:0070887)	2274	20	6.87	+	2.91	3.17e-06	0.00125
negative regulation of gene expression (GO:0010629)	1614	14	4.88	+	2.87	0.000201	0.0324
regulation of multicellular organismal process (GO:0051239)	2052	17	6.2	+	2.74	5.53e-05	0.0126
regulation of developmental process (GO:0050793)	1946	16	5.88	+	2.72	0.000111	0.0203
cellular response to organic substance (GO:0071310)	1843	15	5.57	+	2.69	0.000222	0.0344
cell surface receptor signaling pathway (GO:0007166)	1948	15	5.89	+	2.55	0.000408	0.0499
response to stress (GO:0006950)	2880	22	8.7	+	2.53	7.99e-06	0.0025
negative regulation of macromolecule metabolic process (GO:0010605)	2255	17	6.81	+	2.5	0.000181	0.0306
response to chemical (GO:0042221)	3214	22	9.71	+	2.27	6.5e-05	0.014
response to stimulus (GO:0050896)	6330	36	19.13	+	1.88	4.09e-07	0.000292
biological regulation (GO:0065007)	9547	40	28.85	+	1.39	0.000263	0.0383

## Sheet: MF
GO molecular function complete	BG_Genes.txt - REFLIST (14893)	upload_1 (45)	upload_1 (expected)	upload_1 (over/under)	upload_1 (fold Enrichment)	upload_1 (raw P-value)	upload_1 (FDR)
MHC class II receptor activity (GO:0032395)	8	4	0.02	+	> 100	3.49e-08	0.000153
CXCR chemokine receptor binding (GO:0045236)	13	3	0.04	+	76.37	1.39e-05	0.0152
MHC class II protein complex binding (GO:0023026)	14	3	0.04	+	70.92	1.69e-05	0.0147
peptide antigen binding (GO:0042605)	26	4	0.08	+	50.92	1.86e-06	0.00271
MHC protein complex binding (GO:0023023)	20	3	0.06	+	49.64	4.34e-05	0.0316
polysaccharide binding (GO:0030247)	22	3	0.07	+	45.13	5.61e-05	0.035
immune receptor activity (GO:0140375)	98	6	0.3	+	20.26	6.44e-07	0.00141

## Sheet: CC
GO cellular component complete	BG_Genes.txt - REFLIST (14893)	upload_1 (45)	upload_1 (expected)	upload_1 (over/under)	upload_1 (fold Enrichment)	upload_1 (raw P-value)	upload_1 (FDR)
MHC class II protein complex (GO:0042613)	14	7	0.04	+	> 100	1.56e-13	2.99e-10
haptoglobin-hemoglobin complex (GO:0031838)	5	2	0.02	+	> 100	0.000185	0.00866
hemoglobin complex (GO:0005833)	6	2	0.02	+	> 100	0.000246	0.011
MHC protein complex (GO:0042611)	23	7	0.07	+	> 100	2.67e-12	2.57e-09
integral component of lumenal side of endoplasmic reticulum membrane (GO:0071556)	26	5	0.08	+	63.65	3.16e-08	1.52e-05
lumenal side of endoplasmic reticulum membrane (GO:0098553)	26	5	0.08	+	63.65	3.16e-08	1.22e-05
lumenal side of membrane (GO:0098576)	31	5	0.09	+	53.38	6.94e-08	1.91e-05
clathrin-coated endocytic vesicle membrane (GO:0030669)	60	6	0.18	+	33.1	4.2e-08	1.34e-05
ER to Golgi transport vesicle membrane (GO:0012507)	56	5	0.17	+	29.55	1.04e-06	0.000124
clathrin-coated endocytic vesicle (GO:0045334)	75	6	0.23	+	26.48	1.45e-07	2.79e-05
COPII-coated ER to Golgi transport vesicle (GO:0030134)	84	6	0.25	+	23.64	2.72e-07	4.76e-05
trans-Golgi network membrane (GO:0032588)	74	5	0.22	+	22.36	3.77e-06	0.000362
clathrin-coated vesicle membrane (GO:0030665)	92	6	0.28	+	21.58	4.52e-07	7.25e-05
basal part of cell (GO:0045178)	55	3	0.17	+	18.05	0.000702	0.03
transport vesicle membrane (GO:0030658)	170	7	0.51	+	13.63	9.04e-07	0.000116
coated vesicle membrane (GO:0030662)	150	6	0.45	+	13.24	6.85e-06	0.000549
clathrin-coated vesicle (GO:0030136)	160	6	0.48	+	12.41	9.79e-06	0.000753
integral component of endoplasmic reticulum membrane (GO:0030176)	136	5	0.41	+	12.17	6.29e-05	0.00356
endocytic vesicle membrane (GO:0030666)	165	6	0.5	+	12.03	1.16e-05	0.000826
intrinsic component of endoplasmic reticulum membrane (GO:0031227)	142	5	0.43	+	11.65	7.67e-05	0.0041
coated vesicle (GO:0030135)	251	7	0.76	+	9.23	1.09e-05	0.00081
endocytic vesicle (GO:0030139)	290	8	0.88	+	9.13	2.59e-06	0.000277
trans-Golgi network (GO:0005802)	196	5	0.59	+	8.44	0.000331	0.0145
side of membrane (GO:0098552)	475	12	1.44	+	8.36	1.36e-08	8.72e-06
external side of plasma membrane (GO:0009897)	287	7	0.87	+	8.07	2.55e-05	0.00163
lytic vacuole membrane (GO:0098852)	331	8	1	+	8	6.71e-06	0.000587
lysosomal membrane (GO:0005765)	331	8	1	+	8	6.71e-06	0.000561
vacuolar membrane (GO:0005774)	373	8	1.13	+	7.1	1.57e-05	0.00108
transport vesicle (GO:0030133)	335	7	1.01	+	6.92	6.66e-05	0.00366
endosome membrane (GO:0010008)	435	9	1.31	+	6.85	5.72e-06	0.000523
lytic vacuole (GO:0000323)	586	12	1.77	+	6.78	1.3e-07	3.12e-05
lysosome (GO:0005764)	586	12	1.77	+	6.78	1.3e-07	2.78e-05
vacuole (GO:0005773)	663	12	2	+	5.99	4.79e-07	7.08e-05
cell surface (GO:0009986)	664	12	2.01	+	5.98	4.86e-07	6.68e-05
cytoplasmic vesicle membrane (GO:0030659)	634	11	1.92	+	5.74	2.37e-06	0.000268
vesicle membrane (GO:0012506)	653	11	1.97	+	5.58	3.14e-06	0.000318
plasma membrane protein complex (GO:0098797)	509	8	1.54	+	5.2	0.000136	0.0067
endosome (GO:0005768)	822	9	2.48	+	3.62	0.000708	0.0296
bounding membrane of organelle (GO:0098588)	1713	16	5.18	+	3.09	2.34e-05	0.00155
cytoplasmic vesicle (GO:0031410)	1976	17	5.97	+	2.85	3.4e-05	0.00211
intracellular vesicle (GO:0097708)	1981	17	5.99	+	2.84	3.51e-05	0.00211
extracellular space (GO:0005615)	2535	18	7.66	+	2.35	0.00023	0.0105
extracellular region (GO:0005576)	3171	22	9.58	+	2.3	5.86e-05	0.00341
vesicle (GO:0031982)	3097	21	9.36	+	2.24	0.000121	0.0063
plasma membrane (GO:0005886)	4144	25	12.52	+	2	0.000153	0.00735
cell periphery (GO:0071944)	4501	26	13.6	+	1.91	0.000135	0.00684
membrane (GO:0016020)	7245	33	21.89	+	1.51	0.000911	0.0373
