# Supplementary material for: Transcriptional Profiling of a Patient-Matched Cohort of Glioblastoma (IDH-Wildtype) for Therapeutic Target and Repurposing Drug Identification
Source: Biomedicines. 2023 Apr 19;11(4):1219. doi: 10.3390/biomedicines11041219 (PMC10135924; doi:10.3390/biomedicines11041219)
Supplement: Supplementary file 1 [file biomedicines-11-01219-s001.zip › Table S7_Quadratic_ALL.xlsx]

## Sheet: Sheet1
Table Signficant negative connections listed for all cell lines
Set ID	Num Profiles	Z-Score	Connection Score	P-Value
ROSIGLITAZONE__HEC108	3	-5.89276	-0.399945	3.52504e-09
ESCITALOPRAM__HA1E	8	-5.6273	-0.218851	2.0975e-08
RIFAMPICIN__VCAP	10	-5.533	-0.19478	2.92923e-08
MEDROXYPROGESTERONE__HA1E	6	-5.4993	-0.273254	4.07059e-08
ROSIGLITAZONE__SW620	3	-5.46676	-0.414787	4.94079e-08
NIZATIDINE__NPC	4	-5.37657	-0.27829	8.19121e-08
MEPACRINE__A549	64	-5.28385	-0.1689	1.27683e-07
CHLORPHENAMINE__VCAP	19	-5.19935	-0.162241	2.29031e-07
ENTECAVIR__HEPG2	3	-5.1797	-0.31591	2.13678e-07
BETAHISTINE__A549	5	-5.131	-0.274382	2.82993e-07
GOSERELIN__A375	4	-5.06392	-0.26874	4.70973e-07
METYRAPONE__A549	6	-5.03186	-0.234927	4.45929e-07
ENTECAVIR__HA1E	3	-5.00445	-0.307781	5.39327e-07
PILOCARPINE__A549	6	-4.97689	-0.20127	6.06434e-07
ZILEUTON__MDST8	2	-4.90318	-0.339201	8.88381e-07
BROMFENAC__HA1E	3	-4.88818	-0.302467	1.01406e-06
IOBENGUANE__A549	5	-4.88534	-0.255286	1.23571e-06
LATANOPROST__VCAP	10	-4.88149	-0.210098	1.06939e-06
ROXATIDINE__A549	6	-4.85261	-0.218798	1.07741e-06
AMLEXANOX__A549	6	-4.81944	-0.218237	1.48593e-06
PERHEXILINE__A549	61	-4.81751	-0.131026	1.44642e-06
GLIBENCLAMIDE__SNU1040	2	-4.74949	-0.310793	2.32744e-06
TINIDAZOLE__MCF7	13	-4.69898	-0.160092	2.67415e-06
METHAZOLAMIDE__HCC515	1	-4.68872	-0.433484	2.66487e-06
DIAZEPAM__A549	6	-4.64833	-0.198208	2.9247e-06
FLUOROMETHOLONE__PC3	9	-4.63242	-0.200128	3.60879e-06
PIMOZIDE__SW620	4	-4.61061	-0.264218	4.82584e-06
DILTIAZEM__SKB	3	-4.58249	-0.280732	3.85152e-06
LETROZOLE__A549	12	-4.57036	-0.164215	4.88436e-06
ITRACONAZOLE__CORL23	2	-4.56686	-0.286971	5.99712e-06
TRETINOIN__HCC515	3	-4.54494	-0.284553	5.69291e-06
PROMAZINE__NCIH596	2	-4.51873	-0.288425	5.85113e-06
MOLINDONE__VCAP	19	-4.50206	-0.130555	8.83466e-06
MOMETASONE__MCF7	9	-4.4941	-0.175903	6.84372e-06
LAMOTRIGINE__A549	11	-4.49154	-0.154584	7.03248e-06
XYLOMETAZOLINE__MCF7	7	-4.49001	-0.194599	6.37536e-06
MUPIROCIN__HCC515	2	-4.47726	-0.305979	8.65551e-06
MOEXIPRIL__HCC515	5	-4.47223	-0.208983	7.08459e-06
KETOTIFEN__MCF7	50	-4.46155	-0.0906815	1.03171e-05
PANTOPRAZOLE__NPC	4	-4.45828	-0.234579	7.37667e-06
CYPROHEPTADINE__MCF7	14	-4.44211	-0.165793	1.04873e-05
TOLMETIN__NPC	3	-4.44007	-0.301821	9.66986e-06
ESCITALOPRAM__VCAP	20	-4.43953	-0.148012	9.49766e-06
ROPIVACAINE__MCF7	7	-4.437	-0.212621	1.0111e-05
DESOXIMETASONE__MCF7	7	-4.42185	-0.193709	1.19857e-05
FLECAINIDE__HA1E	9	-4.41301	-0.169517	1.03268e-05
FLUMAZENIL__HA1E	8	-4.40935	-0.199193	9.32124e-06
ALTRETAMINE__ASC	3	-4.40554	-0.266158	1.08342e-05
GEMFIBROZIL__NEU	6	-4.39065	-0.193212	1.01326e-05
PHENYTOIN__HA1E	3	-4.38794	-0.249318	1.14167e-05
MEBENDAZOLE__PHH	3	-4.38584	-0.294491	1.10086e-05
THIORIDAZINE__SNU1040	2	-4.38457	-0.286399	1.09759e-05
BALSALAZIDE__MCF7	7	-4.37608	-0.200881	1.40765e-05
MENADIONE__MCF7	109	-4.36868	-0.0894893	1.52329e-05
VALACICLOVIR__A549	6	-4.35035	-0.197972	1.49978e-05
PHENOXYBENZAMINE__A549	9	-4.34435	-0.171198	1.43668e-05
MEPHENTERMINE__MCF7	15	-4.33546	-0.135682	1.22477e-05
MUPIROCIN__HA1E	3	-4.31273	-0.28813	1.6352e-05
CROTAMITON__PHH	2	-4.30393	-0.299481	1.58683e-05
MENADIONE__A549	66	-4.30042	-0.116251	2.04756e-05
FELBAMATE__PHH	3	-4.25733	-0.274886	2.32572e-05
BICALUTAMIDE__NPC	4	-4.25023	-0.254919	1.99153e-05
METHOXSALEN__VCAP	19	-4.23854	-0.115383	2.61539e-05
DOPAMINE__VCAP	10	-4.23715	-0.169803	2.53826e-05
PROGESTERONE__NEU.KCL	5	-4.18986	-0.228618	2.80571e-05
PROGESTERONE__HT29	9	-4.15559	-0.167253	3.34574e-05
NELFINAVIR__VCAP	10	-4.15065	-0.200586	3.83839e-05
SULFAFURAZOLE__HA1E	12	-4.14839	-0.131209	3.18168e-05
ALFUZOSIN__VCAP	20	-4.1423	-0.124121	3.09214e-05
FLUCONAZOLE__VCAP	17	-4.13661	-0.109426	3.47087e-05
CEFAZOLIN__VCAP	10	-4.13087	-0.145246	3.77211e-05
AMLODIPINE__VCAP	10	-4.1038	-0.173865	4.10504e-05
TROPICAMIDE__A549	10	-4.10207	-0.165014	3.88019e-05
EXEMESTANE__MCF7	4	-4.09713	-0.224399	4.00817e-05
NALTREXONE__HCC515	5	-4.09352	-0.215722	3.84573e-05
GUAIFENESIN__PC3	15	-4.09241	-0.128768	4.14128e-05
PROCATEROL__MCF7	31	-4.09114	-0.12917	4.53513e-05
CLOMIFENE__NPC	4	-4.07676	-0.24027	4.878e-05
NIFEDIPINE__SNUC5	2	-4.07483	-0.286573	4.5455e-05
METOCLOPRAMIDE__MCF7	14	-4.07048	-0.123062	5.62053e-05
AMIODARONE__CORL23	1	-4.0661	-0.384496	5.21364e-05
HYDROXYCHLOROQUINE__NEU	6	-4.06029	-0.18963	4.98474e-05
DULOXETINE__ASC	4	-4.04287	-0.217107	5.49653e-05
METIXENE__VCAP	9	-4.03711	-0.17319	5.15819e-05
ATOMOXETINE__VCAP	16	-4.03667	-0.126693	5.1602e-05
ZAFIRLUKAST__A375	8	-4.02414	-0.159527	5.23114e-05
AZELASTINE__A549	6	-4.01903	-0.174984	6.51753e-05
NITRENDIPINE__SNU1040	2	-4.019	-0.264938	5.27763e-05
FENOTEROL__MCF7	18	-4.01807	-0.104743	6.36687e-05
FLUMAZENIL__A549	12	-4.0117	-0.158666	6.42932e-05
LOPERAMIDE__T3M10	2	-4.00465	-0.312675	6.41657e-05
ZILEUTON__HCC515	9	-3.99245	-0.155665	6.82895e-05
NELFINAVIR__MCF7	3	-3.98865	-0.237656	7.64744e-05
DROPERIDOL__HEPG2	6	-3.98527	-0.173811	7.66397e-05
THIORIDAZINE__A549	69	-3.97397	-0.117564	8.4773e-05
DICLOFENAMIDE__PHH	3	-3.97267	-0.25647	7.88198e-05
ENZALUTAMIDE__NCIH1694	2	-3.97131	-0.261769	8.40397e-05
CISAPRIDE__MCF7	15	-3.96894	-0.122586	7.07188e-05
TROPICAMIDE__VCAP	29	-3.9656	-0.104892	8.76813e-05
NITAZOXANIDE__MCF7	4	-3.96016	-0.214122	7.11334e-05
CRIZOTINIB__MCF10A	32	-3.95839	-0.116973	8.38519e-05
DINOPROSTONE__NPC	10	-3.94876	-0.145699	7.4041e-05
ESTROPIPATE__A549	12	-3.94731	-0.133423	7.66284e-05
FLUPIRTINE__SKB	4	-3.94723	-0.223729	8.16871e-05
TEMOZOLOMIDE__SW620	4	-3.93795	-0.209804	9.02905e-05
LEVOCABASTINE__NEU	2	-3.92988	-0.293602	7.51996e-05
TAMOXIFEN__HCC515	71	-3.92835	-0.0789953	8.31181e-05
PEFLOXACIN__HA1E	2	-3.92437	-0.297725	8.43429e-05
ROSIGLITAZONE__NCIH596	2	-3.90652	-0.271053	8.5984e-05
CARBAMAZEPINE__VCAP	29	-3.87566	-0.109072	9.65991e-05
NITRENDIPINE__MDST8	2	-3.8721	-0.269621	9.55967e-05
